# Supplementary material
Source: PubMed Central journal article supplement (PMC5795620)
Supplement: NIHMS933137-supplement-Supporting_info.pdf [file NIHMS933137-supplement-Supporting_info.pdf]

## SUPPORTING INFORMATION

### ***N*-(Pivaloyloxy)alkoxy-carbonyl Prodrugs of the Glutamine Antagonist 6-Diazo-5-oxo-L-norleucine (DON) as a Potential Treatment for HIV Associated Neurocognitive Disorders**

*Michael T. Nedelcovych*<sup>1,2#</sup>, *Lukáš Tenora*<sup>9#</sup>, *Boe-Hyun Kim*<sup>10</sup>, *Jennifer Kelschenbach*<sup>10</sup>, *Wei Chao*<sup>10</sup>, *Eran Hadas*<sup>10</sup>, *Andrej Jančařík*<sup>9</sup>, *Eva Prchalová*<sup>1,9</sup>, *Sarah C. Zimmermann*<sup>1,2</sup>, *Ranjeet P. Dash*<sup>1</sup>, *Alexandra J. Gadiano*<sup>1</sup>, *Caroline Garrett*<sup>7</sup>, *Georg Furtmüller*<sup>8</sup>, *Byoungchol Oh*<sup>8</sup>, *Gerald Brandacher*<sup>8</sup>, *Jesse Alt*<sup>1</sup>, *Pavel Majer*<sup>9\*</sup>, *David J. Volsky*<sup>10\*</sup>, *Rana Rais*<sup>1,2\*</sup>, *Barbara S. Slusher*<sup>1,2,3,4,5,6\*</sup>

<sup>1</sup>Johns Hopkins Drug Discovery, Departments of <sup>2</sup>Neurology, <sup>3</sup>Medicine, <sup>4</sup>Oncology, <sup>5</sup>Psychiatry, <sup>6</sup>Neuroscience, <sup>7</sup>Molecular and Comparative Pathobiology, and <sup>8</sup>Vascularized Composite Allotransplantation Laboratory, Department of Plastic and Reconstructive Surgery  
Johns Hopkins School of Medicine, Baltimore, MD 21205, U.S.A.

<sup>9</sup>Institute of Organic Chemistry and Biochemistry, Academy of Sciences of the Czech Republic  
v.v.i., Prague, Czech Republic

<sup>10</sup>Department of Medicine, Icahn School of Medicine at Mount Sinai, New York, NY, 10029,  
U.S.A.

# These authors contributed equally

#### **Table of Contents**

**Figure S1.** Representative chromatogram showing metabolism of **13d** in mouse plasma.....S2

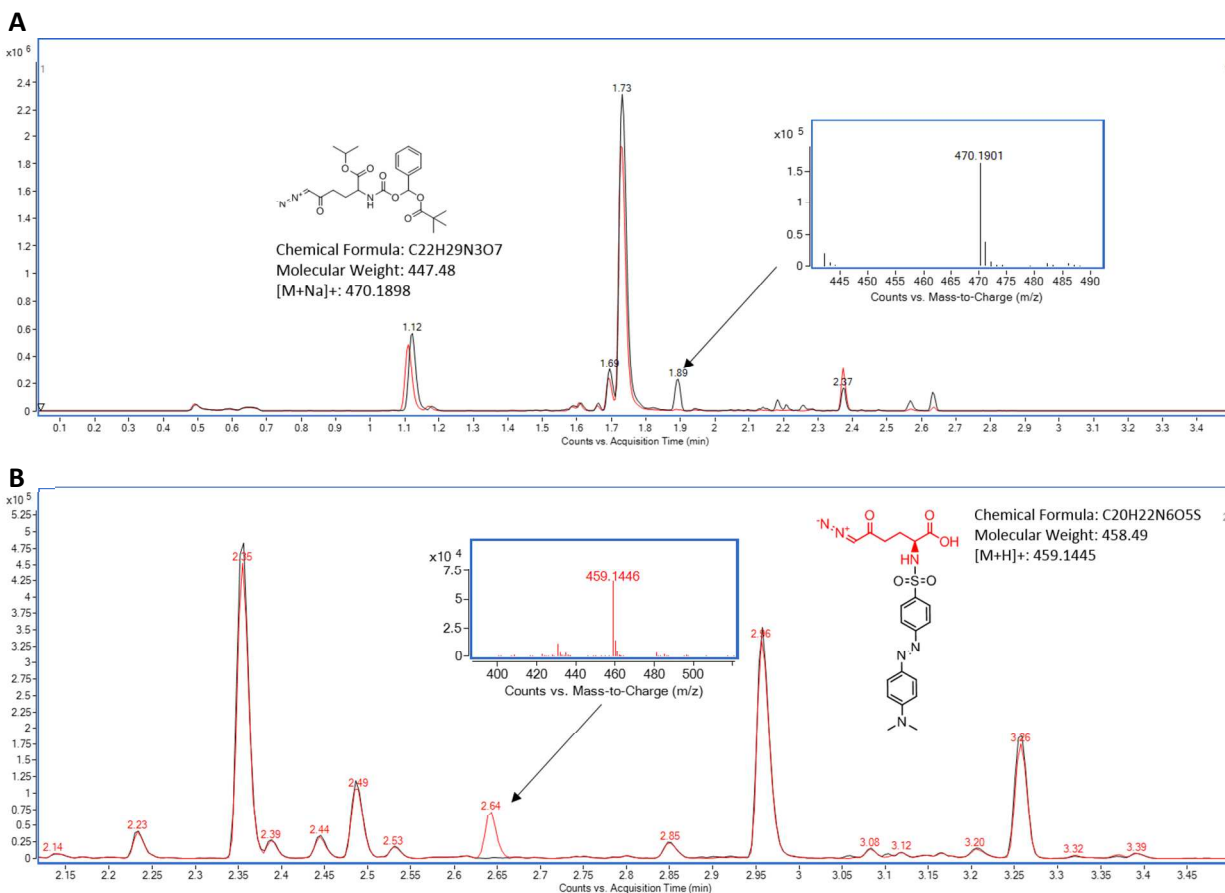

**Figure S1. Representative chromatogram depicting rapid disappearance of DON prodrug and liberation of DON (14) in mouse plasma.** Compound **13d** (10  $\mu$ M) was incubated in mouse plasma and monitored over time by LC-MS which detected (A) a peak corresponding to intact **13d** at time t=0 min (black line, retention time =1.89 min, m/z=470.1901), that disappeared by time t=10 min (red line), indicating rapid metabolism of the prodrug in mouse plasma. In a complimentary experiment (B), a peak corresponding to derivatized DON (**14**) was absent at t=0 min (black line), but appeared at time t=10 min (red line, retention time =2.64 min, m/z 459.1446).
